# Supplementary material
Source: publisher figshare collection journal article supplement (https://future-science-group.figshare.com/articles/dataset/_/19122146)
Supplement: Supplementary file 1 [file 2]

## Sheet: Supplementary Table 2
Supplementary Table 2: Reagents, supplies and equipment table
Name	Company	Catalog Number	Comments	Protocol step
Lentiviral vectors
LentiCRISPRv2-GFP	Addgene	82416		3
LentiMPHv2	Addgene	89308		3
LentiSAMv2	Addgene	75112		3
pMD2.G	Addgene	12259		3
psPAX2	Addgene	12260		3
Reagents
10X Tris/Glycine Buffer	Bio-Rad	1610734	1X
4X SDS Loading Dye	BioRad	1610747		10
Agarose	Bioline	BIO-41026		5A
Ampicillin (Sodium)	GoldBio Technology	A-301-SL10	100 mg/mL	5D
Anti-CDA antibody	Santa Cruz Biotechnology	sc-365292	1:100 dilution	10
Anti-DCK antibody	Santa Cruz Biotechnology	sc-393099	1:100 dilution	10
Anti-GAPDH antibody	Abcam	ab9485	1:5000 dilution	10
Anti-Mouse IgG-HRP antibody	Santa Cruz Biotechnology	sc-516102	1:5000 dilution	10
Anti-TP53 antibody	Santa Cruz Biotechnology	sc-126	1:200 dilution	10
Blasticidin S HCl	Thermo Fisher Scientific	A11139-03	10 mg/mL	8B & 9
Blotting-Grade Blocker	BioRad	1706404		10
BsmBI	New England Biolabs	R0739	10,000 U/mL	5
cOmplete Mini Protease Inhibitor Cocktail	Roche	11836153001	1 Tablet/10 mL RIPA	10
Cytosine β-D-arabinofuranoside (Ara-C)	Sigma-Aldrich	C1768	1 mM	12
DAPI	Invitrogen	D1306	5 µg/ml	10B
DMEM Media	Thermo Fisher Scientific	11965-092		6A
EvaGreen 20X	Biotium	17E0331-1075001		2
Fetal Bovine Serum	VWR	97068-085		1
Geneticin	Thermo Fisher Scientific	11811-023		6A
HEK293FT cells	Thermo Fisher Scientific	R70007	https://www.thermofisher.com/order/catalog/product/R70007#/R70007	6A
Hot Start Taq 2X MM	New England Biolabs	M0496S		2
Hygromycin B	Thermo Fisher Scientific	10687010	50 mg/mL	8A
L-Glutamine	Sigma-Aldrich	G8540		6A
Lipofectamine 2000	Thermo Fisher Scientific	11668019		6B
MEM Non-Essential Amino Acids	Thermo Fisher Scientific	11140-050	100X	6A
MOLM-13 cells	Gifted from Loughran Lab			1
One Shot Chemically Competent Stbl3 cells	Thermo Fisher Scientific	C737303	https://www.thermofisher.com/order/catalog/product/C737303#/C737303	5D
Opti-MEM Media	Thermo Fisher Scientific	31985-070		6B
Penicillin-Streptomycin	Thermo Fisher Scientific	15140-122	10,000 U/mL	6
Pierce ECL Western Blotting Substrate	Thermo Fisher Scientific	32106	5% in PBS	10
PLUS Reagent	Thermo Fisher Scientific	11514015		6B
Polybrene	Sigma-Aldrich	107689	1 mg/mL	7
Q5 Hot Start High Fidelity 2X Master Mix	New England Biolabs	M0494S		5A
RIPA Buffer	Sigma-Aldrich	R0278		10
RPMI 1640 Media	Thermo Fisher Scientific	31800-105		1
Sodium Chloride	Fisher BioReagents	S640-500		5D
Sodium Pyruvate	Thermo Fisher Scientific	11360-070	100 mM	6A
Tryptone	Fisher BioReagents	BP1421-500		5D
UltraPure Distilled Water	Thermo Fisher Scientific	10977-023		2
Yeast Extract	Fisher BioReagents	BP1422-500		5D
Supplies
0.45 µM filter	VWR	89220-730	Lentiviral media filter	6B
Immun-Blot PVDF Membrane	BioRad	1620177	0.2 µm	10
Assay Kits
CellTiter Non-radioactive Proliferation Assay	Promega	G4100		11B
Click-iT Plus EdU Alexa Fluor 647 Flow Cytometry Assay	Thermo Fisher Scientific	C10635		11B
NEBuilder HiFi DNA Assembly Cloning Kit	New England Biolabs	M5520		5D
QIAprep Spin Miniprep Kit	Qiagen	27104		5A
STR Profiling 300	Cell Line Genetics	https://clgenetics.com/	MOLM13 cell authentication	1
Equipment and Software
Attune NxT Flow Cytometer	Thermo Fisher Scientific	Model number		11A
BioTek Plate Reader	BioTek Instruments			11B
Cell-IQ Series 5.8 cu. ft. High Heat Sterilization CO2 Incubator	Panasonic	model number MCO-170AICUVDL	5% CO2
FCS Express 7	Denovo	https://denovosoftware.com/
Geneious Prime	Geneious	https://www.geneious.com/	DNA sequence anlysis	5E
Influx Cell Sorter	BD Biosciences	646500		8, 9, & 7B
NanoDrop One Microvolume UV-Vis Spectrophotometer	Thermo Fisher Scientific	ND-ONE-W		5a
StepOnePlus Real-Time PCR System	Applied Biosystems	4376600		2
Vendors
GENEWIZ	GENEWIZ	https://www.genewiz.com/	sanger sequencing services
IDT	Integrated DNA Technologies	https://www.idtdna.com/	sgRNA and primer synthesis
